# Supplementary material for: Ultrasonography evaluation of the inferior vena cava collapsibility index and the superior vena cava distensibility index for predicting hypotension during general anesthesia in atrial fibrillation patients：a prospective observational study
Source: Research Square preprint supplement (doi:10.21203/rs.3.rs-6444922/v1), 2025-05-07
Supplement: Supplementary file 1 [file 437940de592802c6a139053d.docx]

STROBE Statement—checklist of items that should be included in reports of observational studies

|  | Item No. | Recommendation | Page  No. | Relevant text from manuscript |
| --- | --- | --- | --- | --- |
| **Title and abstract** | 1 | (*a*) Indicate the study’s design with a commonly used term in the title or the abstract | 1 | aprospective observational study |
| (*b*) Provide in the abstract an informative and balanced summary of what was done and what was found | 2-3 | Hypotension was classified as the mean arterial pressure (MAP) below 60 mmHg or more than 20% below the baseline level. The main outcome was the ultrasound measurements of IVCCI and SVCDI in AF patients and their association with hypotension during general anesthesia. Preoperative IVCCI>34.1% indicates a non-invasive predictor of PIH in AF patients; SVCDI>17.8% suggest a reliable predictor of eIOH in AF patients. |
| Introduction | | | |  |
| Background/rationale | 2 | Explain the scientific background and rationale for the investigation being reported | 4-5 | Recently recommended dynamic parameters for assessing volume status include ultrasound measurements of the inferior vena cava (IVC) diameter with respiration[9-10]. These parameters, such as the maximum diameter of the IVC (IVCmax) at the end of expiration and the collapsibility index (CI), have been suggested as rapid, noninvasive methods to predict anesthesia-related hypotension[11-12]. However, patients with AF lack atrial contraction support during left ventricular diastolic filling, which can lead to elevated left atrial pressure and necessitate greater volume management. |
| Objectives | 3 | State specific objectives, including any prespecified hypotheses | 5 | This study aims to explore the clinical value of the inferior vena cava collapsibility index and the superior vena cava distensibility index in predicting the occurrence of PIH and eIOH events in atrial fibrillation patients. |
| Methods | | | |  |
| Study design | 4 | Present key elements of study design early in the paper | 5 |  |
| Setting | 5 | Describe the setting, locations, and relevant dates, including periods of recruitment, exposure, follow-up, and data collection | 5 | We selected 77 patients with atrial fibrillation (aged 65–85) who underwent left atrial appendage occlusion under general anesthesia at Shanghai Zhoupu Hospital between June 2022 and January 2023, based on sample size calculations. The Institutional Ethics Committee of Shanghai Zhoupu Hospital approved the study (Registration number:2022-C-027-E0). |
| Participants | 6 | (*a*) *Cohort study*—Give the eligibility criteria, and the sources and methods of selection of participants. Describe methods of follow-up  *Case-control study*—Give the eligibility criteria, and the sources and methods of case ascertainment and control selection. Give the rationale for the choice of cases and controls  *Cross-sectional study*—Give the eligibility criteria, and the sources and methods of selection of participants | 5-6 | Participants in this study were at least 65 years old, with a body mass index (BMI) ranging from 18 to 32 kg m-², an American Society of Anesthesiologists (ASA) physical status of 2 to 3, and scheduled for left atrial appendage occlusion. The exclusion criteria were as follows: emergency surgery, sudden life-threatening changes in vital signs, elevated intra-abdominal pressure, expected airway or mental dysfunction, diseases of the autonomic nervous system, current use of angiotensin-converting enzyme inhibitors or angiotensin receptor blockers, presence of an implantable pacemaker or cardioverter, peripheral vascular disease, serious cardiovascular conditions, unstable angina, and an ejection fraction (EF) of less than 40%. |
| (*b*)*Cohort study*—For matched studies, give matching criteria and number of exposed and unexposed  *Case-control study*—For matched studies, give matching criteria and the number of controls per case | 8 | Post-induction hypotension (PIH) was defined by a decrease in mean arterial pressure (MAP) of more than 20% from baseline or any recorded period of MAP below 60 mmHg[17]. MAP is continuously monitored and recorded within the first 15 minutes after the start of surgery. Early intraoperative hypotension (eIOH) was defined as a MAP below 60 mmHg or a reduction of more than 20% from the baseline level within the first 15 minutes after skin incision[8]. |
| Variables | 7 | Clearly define all outcomes, exposures, predictors, potential confounders, and effect modifiers. Give diagnostic criteria, if applicable | 8 | Post-induction hypotension (PIH) was defined by a decrease in mean arterial pressure (MAP) of more than 20% from baseline or any recorded period of MAP below 60 mmHg[17]. MAP is continuously monitored and recorded within the first 15 minutes after the start of surgery. Early intraoperative hypotension (eIOH) was defined as a MAP below 60 mmHg or a reduction of more than 20% from the baseline level within the first 15 minutes after skin incision[8]. |
| Data sources/ measurement | 8* | For each variable of interest, give sources of data and details of methods of assessment (measurement). Describe comparability of assessment methods if there is more than one group | 6-8 | Upon entering the room, peripheral veins were opened, and lactated Ringer's solution was administered at a rate of 30 drops per minute, along with a pre-treatment of 0.05 mg kg-1 of midazolam. Patients were conscious, lying supine, and breathing spontaneously for at least five minutes before the examination. The maximum (IVCmax) and minimum (IVCmin) diameters of the inferior vena cava were measured using ultrasound during one spontaneous respiratory cycle in AF patients, as shown in Fig 1a. The collapsibility index of inferior vena cava (IVCCI) was calculated using the following equation: collapsibility index = (IVCmax-IVCmin)/IVCmax*100[14]. The ultrasound measurement of the inferior vena cava was performed as follows: the patient was positioned supine without a pillow, with hands relaxed at the sides, following the method described by the American Society of Echocardiography[15]: The subxiphoid approach was used, with a phased-array probe from a Siemens Healthineers ACUSON SC2000 machine placed subxiphoid to display the four-chamber view. The probe was then rotated downward towards the spine, with the orientation marker pointing towards the patient's head, to show the inferior vena cava entering the right atrium and the hepatic veins joining the inferior vena cava. The diameter of the inferior vena cava was measured 2 cm from the right atrial entrance, IVCmax and IVCmin were measured by freezing the ultrasound image at end-expiration and end-inspiration respectively. Each site was measured three times, and the average was taken; measurements differing by more than 2 mm were excluded.  After anesthesia induction, the maximum (SVCmax) and minimum (SVCmin) diameters of the superior vena cava were measured using a transesophageal ultrasound probe from a Siemens machine over one mechanical ventilation respiratory cycle in AF patients, as shown in Fig 1b. The distensibility index of superior vena cava (SVCDI) was calculated using the following equation: distensibility index = (SVCmax-SVCmin)/SVCmin*100[16]. The transesophageal ultrasound measurement of the superior vena cava was performed as follows: after the patient was under general anesthesia and mechanically ventilated, the transesophageal ultrasound was adjusted to a depth of 10 cm based on the mid-esophageal bicaval view. This view clearly displayed the left atrium, right atrium, interatrial septum, superior vena cava, inferior vena cava, partial pulmonary veins, and their connections to the right atrium, from which SVCmax and SVCmin were obtained. Each site was measured three times, and the average was taken; measurements differing by more than 2 mm were excluded. The measurement process did not exceed 3 minutes, and the entire induction period did not exceed 5 minutes. All ultrasound measurements were performed by an experienced anesthesiologist who was blinded to the study.  Arterial pressure was measured invasively using an arterial line catheter, which was inserted before anesthesia induction. Hemodynamic data were collected both before (baseline) and after induction. |
| Bias | 9 | Describe any efforts to address potential sources of bias | 6,7,8 | The diameter of the inferior vena cava was measured 2 cm from the right atrial entrance, IVCmax and IVCmin were measured by freezing the ultrasound image at end-expiration and end-inspiration respectively. Each site was measured three times, and the average was taken; measurements differing by more than 2 mm were excluded.  All ultrasound measurements were performed by an experienced anesthesiologist who was blinded to the study.  Anesthesia induction involved a regimen of sufentanil (0.35 µg kg-1) and propofol (1.5 mg kg-1), followed by tracheal intubation facilitated by cisatracurium (1.5 mg kg-1). Anesthesia was maintained with 1.5 vol% inhaled sevoflurane in oxygen-enriched air and remifentanil continuously infused at 6 µg kg-1 h-1. In cases of severe hypotension (MAP < 55 mmHg) or prolonged hypotension episodes (lasting ≥ 3 minutes) during the induction phase or early intraoperative period, intravenous ephedrine 6 mg or norepinephrine infusion at 200 µg h-1[18]. However, patients who experience severe hypotension requiring pharmacological intervention during the induction phase or early intraoperative period are excluded. |
| Study size | 10 | Explain how the study size was arrived at | 8-9 | The sample size was calculated using PASS15.0 software, commonly utilized in clinical research. Based on a literature review, we used the following parameters: the sensitivity of the IVC to predict intraoperative hypotension is 80%, the specificity is 90%, α=0.05. The calculation indicated that 70 cases are needed for this study. To account for a potential dropout rate of 10%, 77 AF patients will be included. |

Continued on next page

| Quantitative variables | 11 | Explain how quantitative variables were handled in the analyses. If applicable, describe which groupings were chosen and why | 9 | Hypotension was classified as the mean arterial pressure (MAP) below 60 mmHg or more than 20% below the baseline level. The correlation between IVC-CI, SVC-DI and the percentage decrease in MAP was assessed. Receiver operating characteristic (ROC) curves of IVC-CI, SVC-DI were separately generated to predict PIH and eIOH. Logistic regression was employed to validate the risk factors for PIH and eIOH in AF patients. |
| --- | --- | --- | --- | --- |
| Statistical methods | 12 | (*a*) Describe all statistical methods, including those used to control for confounding | 9 | Continuous variables are presented as means ± standard deviations if they are normally distributed, as confirmed by the Shapiro-Wilk W test. Non-normally distributed data are displayed as medians and interquartile ranges. For comparisons, we used Student's two-sample t-test and the Mann-Whitney U test. Categorical variables are shown as percentages and absolute case numbers. The χ2-test and Fisher's exact test were used for analyzing contingency tables as appropriate. Two-sided p-values are reported, with a significance threshold set at p <0.05. The pearson correlation coefficient (*r*) was utilized to evaluate the association between measurements and the percentage decrease in MAP from baseline after the induction of general anesthesia.  ROC curve analysis was conducted to evaluate the predictive capability of the two ultrasound-derived parameters, IVCCI and SVCDI, for clinically significant of PIH and eIOH. The areas under the curves (AUCs) with 95% confidence intervals were computed. We compared the two ROC curves using the nonparametric method described by DeLong et al[19]. Optimal cutoff values were determined by the values that maximize the Youden index (sensitivity+specificity-1). Logistic regression was employed to validate the risk factors for PIH and eIOH in AF patients. |
| (*b*) Describe any methods used to examine subgroups and interactions | 9 |  |
| (*c*) Explain how missing data were addressed | 9 |  |
| (*d*) *Cohort study*—If applicable, explain how loss to follow-up was addressed  *Case-control study*—If applicable, explain how matching of cases and controls was addressed  *Cross-sectional study*—If applicable, describe analytical methods taking account of sampling strategy | 9 |  |
| (*e*) Describe any sensitivity analyses | 9 |  |
| Results | | | | |
| Participants | 13* | (a) Report numbers of individuals at each stage of study—eg numbers potentially eligible, examined for eligibility, confirmed eligible, included in the study, completing follow-up, and analysed | 10 | A total of 77 AF patients were initially included in this analysis, however, 7 were subsequently excluded due to inadequately visualized IVC in 3 cases and missing data in 4 cases, as shown in Fig 2. Ultimately, 70 AF patients were analyzed. |
| (b) Give reasons for non-participation at each stage | 10 |  |
| (c) Consider use of a flow diagram | 10 |  |
| Descriptive data | 14* | (a) Give characteristics of study participants (eg demographic, clinical, social) and information on exposures and potential confounders | 11 | Thirty-four patients were male and 36 were female. Their mean age was 75.2 ± 6.3 years, mean BMI was 23.9 ± 3.2 kg m-2. Fifteen patients were ASA 2, while 55 were ASA 3. Thirty-two patients developed PIH after induction, 21 patients developed eIOH after skin incision. |
| (b) Indicate number of participants with missing data for each variable of interest |  |  |
| (c) *Cohort study*—Summarise follow-up time (eg, average and total amount) |  |  |
| Outcome data | 15* | *Cohort study*—Report numbers of outcome events or summary measures over time | 11 | Thirty-two patients developed PIH after induction, 21 patients developed eIOH after skin incision. |
| *Case-control study—*Report numbers in each exposure category, or summary measures of exposure |  |  |
| *Cross-sectional study—*Report numbers of outcome events or summary measures |  |  |
| Main results | 16 | (*a*) Give unadjusted estimates and, if applicable, confounder-adjusted estimates and their precision (eg, 95% confidence interval). Make clear which confounders were adjusted for and why they were included | 14-15 | IVCCI (OR=1.20, 95% CI 1.09-1.31, *P* < 0.001) was associated with the occurrence of PIH in patients with AF, as did the IVCmax (OR=0.55, 95% CI 0.37-0.82, *P* < 0.001). Other parameters were not associated with the occurrence of PIH.  Table 3 shows the results of multivariate linear regression analysis factors predicting eIOH in patients with AF. After adjusting for age, BMI, and baseHR, baseMAP, it was found that IVCCI (OR=1.16, 1.06-1.25, *P*<0.05) and SVCDI (OR=1.14, 1.02-1.27, *P*<0.05) were independent predictors of eIOH. |
| (*b*) Report category boundaries when continuous variables were categorized |  |  |
| (*c*) If relevant, consider translating estimates of relative risk into absolute risk for a meaningful time period |  |  |

Continued on next page

| Other analyses | 17 | Report other analyses done—eg analyses of subgroups and interactions, and sensitivity analyses |  |  |
| --- | --- | --- | --- | --- |
| Discussion | | | | |
| Key results | 18 | Summarise key results with reference to study objectives | 20 | In AF patients, IVCCI and SVCDI can predict the occurrence of PIH and eIOH, preoperative IVCCI>34.1% indicates a non-invasive predictor of PIH; SVCDI>17.8% suggest reliable predictors of eIOH. |
| Limitations | 19 | Discuss limitations of the study, taking into account sources of potential bias or imprecision. Discuss both direction and magnitude of any potential bias | 19 | There are some limitations of our study. A relatively small number of patients were included, although the estimated power of the study was sufficient to detect significant reliable results. The study participants were elderly patients with relatively unstable hemodynamics. These patients were administered various types of oral medications preoperatively, primarily including ventricular rate-controlling medications and antihypertensive medications, which may have affected the validity of the analysis at the extremes of collapsibility index. The relationship between preoperative oral administration of different medications and the magnitude of blood pressure reduction following induction and during the early intraoperative period requires more diverse clinical settings to validate and further develop the findings of this study. |
| Interpretation | 20 | Give a cautious overall interpretation of results considering objectives, limitations, multiplicity of analyses, results from similar studies, and other relevant evidence |  |  |
| Generalisability | 21 | Discuss the generalisability (external validity) of the study results |  |  |
| Other information | |  | | |
| Funding | 22 | Give the source of funding and the role of the funders for the present study and, if applicable, for the original study on which the present article is based | 20 | The study and publication of the manuscript was supported by the Shanghai Medical Innovation & Development Foundation (SMIDF2024-128-4). |

*Give information separately for cases and controls in case-control studies and, if applicable, for exposed and unexposed groups in cohort and cross-sectional studies.

**Note:** An Explanation and Elaboration article discusses each checklist item and gives methodological background and published examples of transparent reporting. The STROBE checklist is best used in conjunction with this article (freely available on the Web sites of PLoS Medicine at http://www.plosmedicine.org/, Annals of Internal Medicine at http://www.annals.org/, and Epidemiology at http://www.epidem.com/). Information on the STROBE Initiative is available at [www.strobe-statement.org.](http://www.strobe-statement.org.)

77 AF patients assessed for eligibility

Anaesthesia induction

Exclusion for hypotension (*n*=7)

Radial artery catheterization for continuous MAP

Pre-anaesthesia induction ultrasound assessment of IVC

Normotensive (*n*=49)

eIOH (*n*=21)

成功

Post-induction SVC ultrasound via TEE

The surgery begins

70 AF patients analyzed

Normotensive (*n*=38)

PIH (*n*=32)
